# Supplementary material for: Pol μ ribonucleotide insertion opposite 8-oxodG facilitates the ligation of premutagenic DNA repair intermediate
Source: PubMed Central journal article supplement (PMC6976671; doi:10.1038/s41598-020-57886-y), 2020-01-22
Supplement: 41598_2020_57886_MOESM1_ESM.pdf [file 41598_2020_57886_MOESM1_ESM.pdf]

## **Supplementary Information**

### **Pol $\mu$ ribonucleotide insertion opposite 8-oxodG facilitates the ligation of premutagenic DNA repair intermediate**

Melike Çağlayan

Department of Biochemistry and Molecular Biology, University of Florida, Gainesville, FL  
32610, USA

\* To whom correspondence should be addressed. Tel: 352-2948383; Fax: 352-3922953;

Email: [caglayanm@ufl.edu](mailto:caglayanm@ufl.edu)

**Supplementary Figures 1-24**  
**Supplementary Tables 1 and 2**  
**Supplementary Schemes 1-3**  
**Supplementary Model 1**

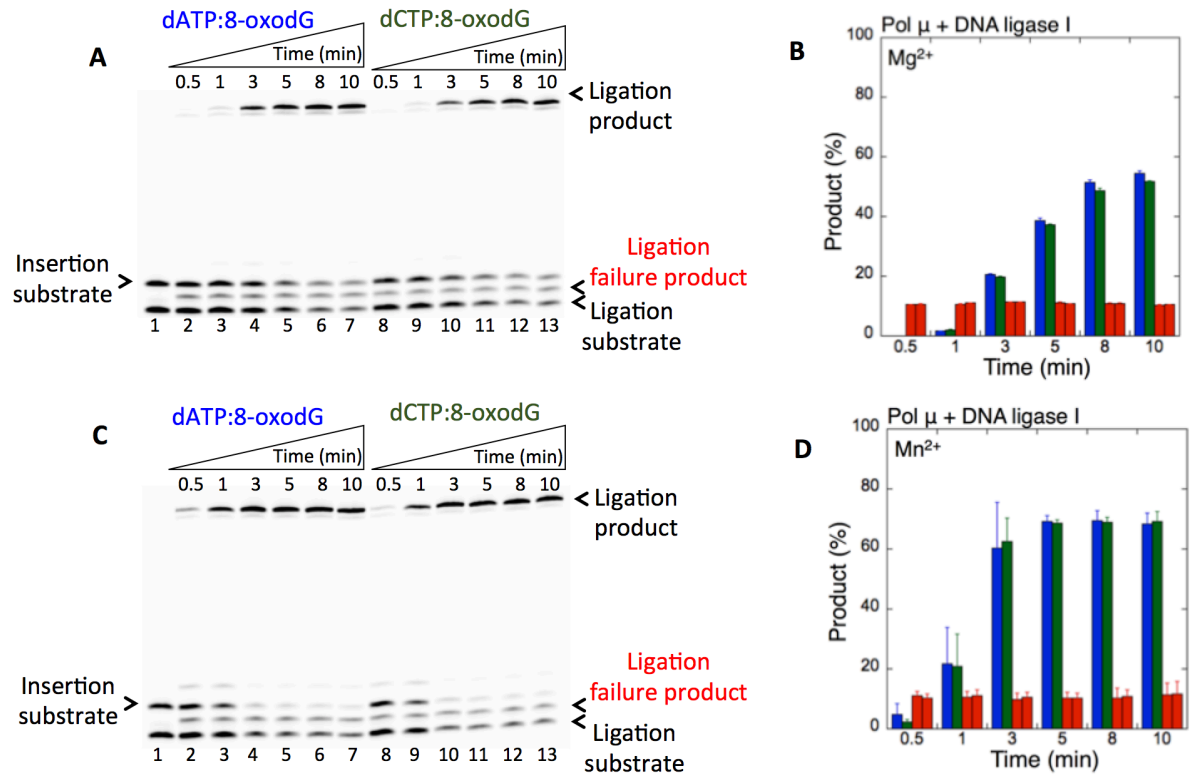

**Supplementary Figure 1.** Pol  $\mu$  dATP and dCTP insertion opposite 8-oxodG coupled with ligation by DNA ligase I in the presence of  $Mg^{2+}$  vs  $Mn^{2+}$ . (A,C) In both panels, lane 1 is the minus enzyme control for the one nucleotide gapped DNA substrate with template 8-oxodG. Lanes 2-7 and 8-13 are the coupled reaction products in the presence of dATP or dCTP, respectively, and correspond to time points of 0.5, 1, 3, 5, 8, and 10 min. (B,D) Graphs show time-dependent changes in the products of ligation (blue and green) and ligation failure (red) in the presence of  $Mg^{2+}$  (B) and  $Mn^{2+}$  (D). The data represent the average of three independent experiments  $\pm$  SD.

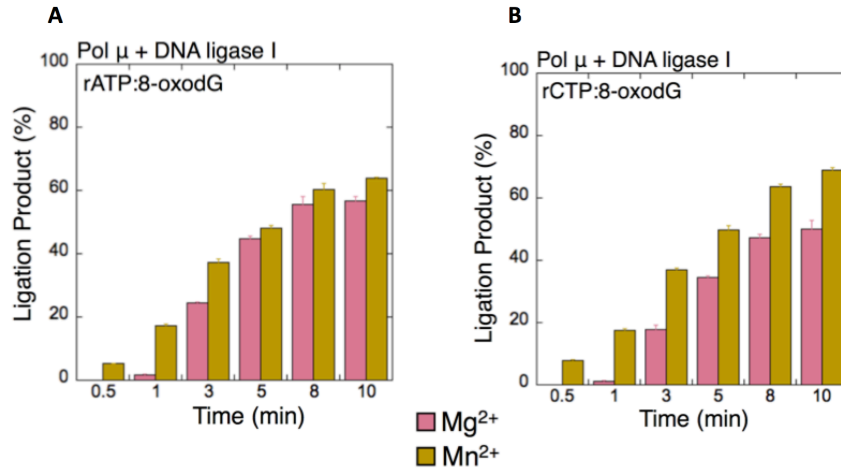

**Supplementary Figure 2.** Graphs show the comparisons for the time-dependent changes in the products of ligation by pol  $\mu$  and DNA ligase I for rATP:8-oxodG (**A**) and rCTP:8-oxodG (**B**) in the presence of  $\text{Mg}^{2+}$  vs  $\text{Mn}^{2+}$ . The data represent the average of three independent experiments  $\pm$  SD.

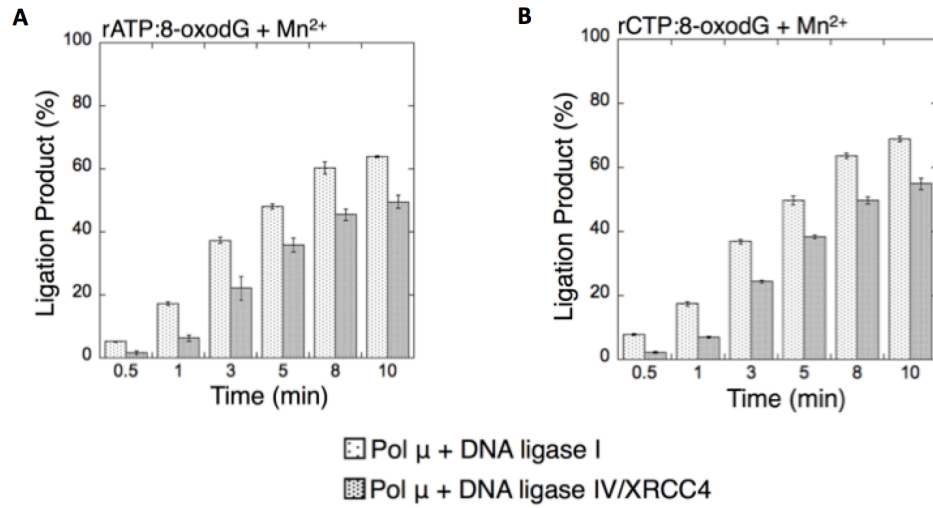

**Supplementary Figure 3.** Graphs show the comparisons for the time-dependent changes in the products of ligation by pol μ and DNA ligase I vs pol μ and DNA ligase IV/XRCC4 complex in the presence of Mn<sup>2+</sup> for rATP:8-oxodG (**A**) and rCTP:8-oxodG (**B**). The data represent the average of three independent experiments ± SD.



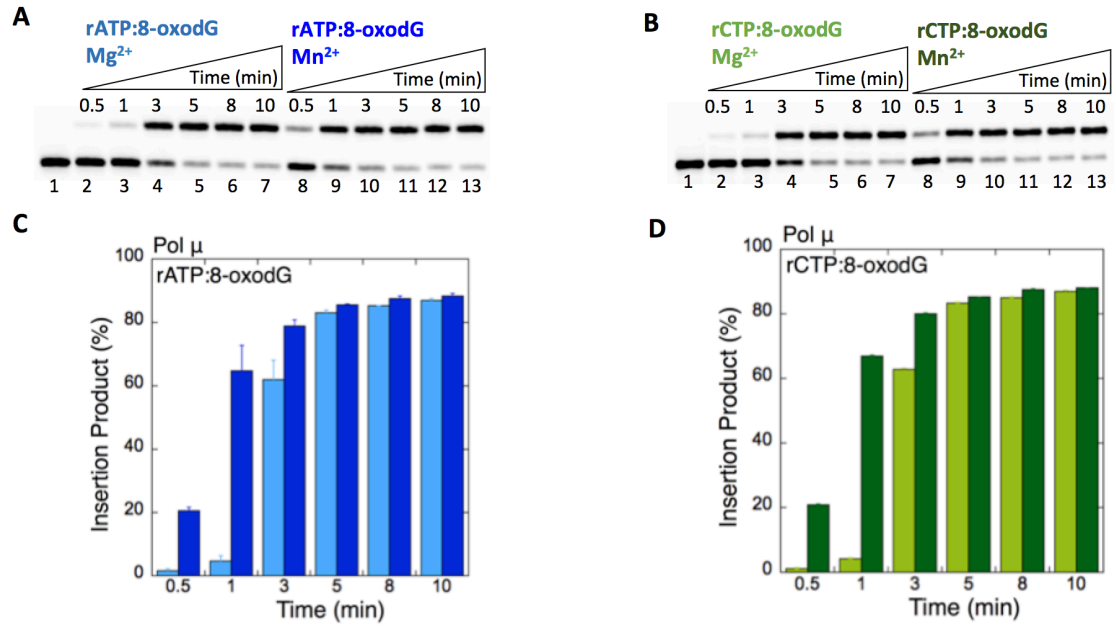

**Supplementary Figure 4.** Pol  $\mu$  rATP and rCTP insertion opposite 8-oxodG in the presence of Mg<sup>2+</sup> vs Mn<sup>2+</sup>. (**A,B**) In both panels, lane 1 is the minus enzyme control for the one nucleotide gapped DNA substrate with template 8-oxodG. Lanes 2-7 and 8-13 are the insertion reaction products for rATP:8-oxodG (**A**) and rCTP:8-oxodG (**B**) in the presence of Mg<sup>2+</sup> vs Mn<sup>2+</sup>, respectively, and correspond to time points of 0.5, 1, 3, 5, 8, and 10 min. (**C,D**) Graphs show time-dependent changes in the products of insertion. The data represent the average of three independent experiments  $\pm$  SD.

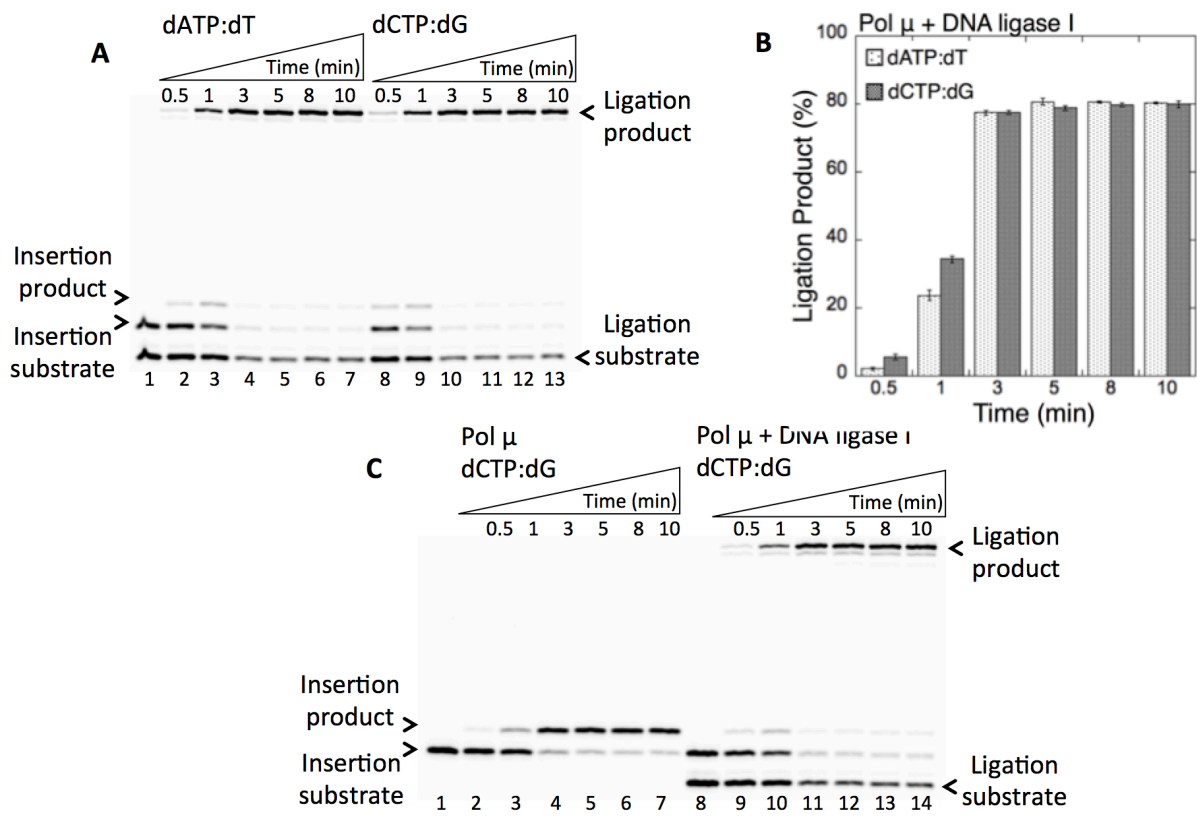

**Supplementary Figure 5.** Pol  $\mu$  dATP:dT and dCTP:dG insertion coupled with ligation by DNA ligase I. (A) Lane 1 is the minus enzyme control for the one nucleotide gapped DNA substrate with template dT. Lanes 2-7 and 8-13 are the coupled reaction products, and correspond to time points of 0.5, 1, 3, 5, 8, and 10 min. (B) Graph shows time-dependent changes in the products of ligation and the data represent the average of three independent experiments  $\pm$  SD. (C) Lanes 1 and 8 are the minus enzyme controls for the one nucleotide gapped DNA substrates with template dG for the insertion and coupled reactions, respectively. Lanes 2-7 and 9-14 are the products of insertion and coupled reactions for dCTP:dG, respectively, and correspond to time points of 0.5, 1, 3, 5, 8, and 10 min.

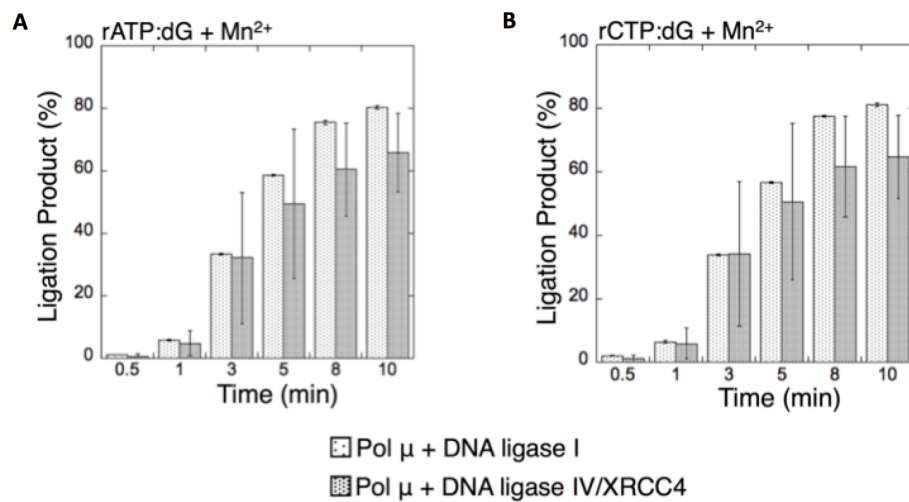

**Supplementary Figure 6.** Graphs show the comparisons for the time-dependent changes in the products of ligation by pol μ and DNA ligase I vs pol μ and DNA ligase IV/XRCC4 complex in the presence of Mn<sup>2+</sup> for rATP:dG (**A**) and rCTP:dG (**B**). The data represent the average of three independent experiments ± SD.

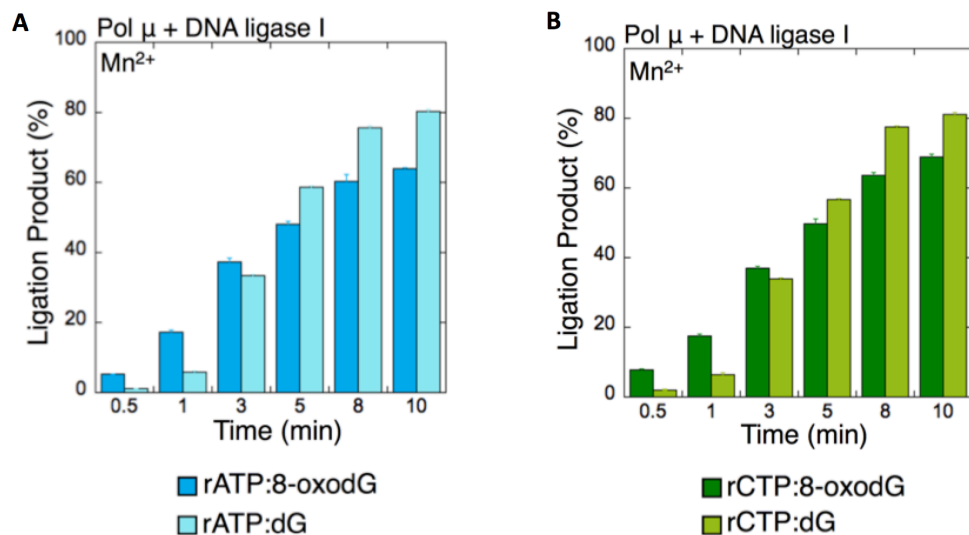

**Supplementary Figure 7.** Graphs show the comparisons for the time-dependent changes in the products of ligation by pol  $\mu$  and DNA ligase I in the presence of Mn<sup>2+</sup> for rATP:8-oxodG vs rATP:dG (**A**) and rCTP:8-oxodG vs rCTP:dG (**B**). The data represent the average of three independent experiments  $\pm$  SD.

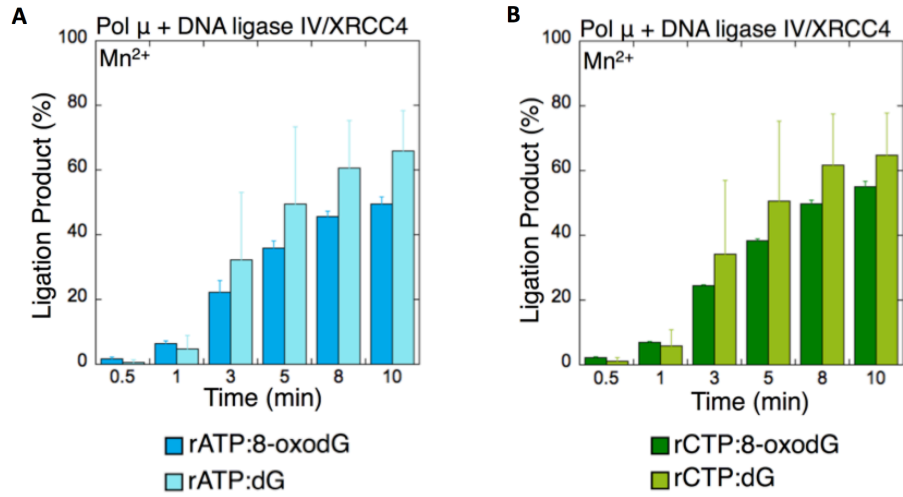

**Supplementary Figure 8.** Graphs show the comparisons for the time-dependent changes in the products of ligation by pol  $\mu$  and DNA ligase IV/XRCC4 complex in the presence of Mn<sup>2+</sup> for rATP:8-oxodG vs rATP:dG (**A**) and rCTP:8-oxodG vs rCTP:dG (**B**). The data represent the average of three independent experiments  $\pm$  SD.

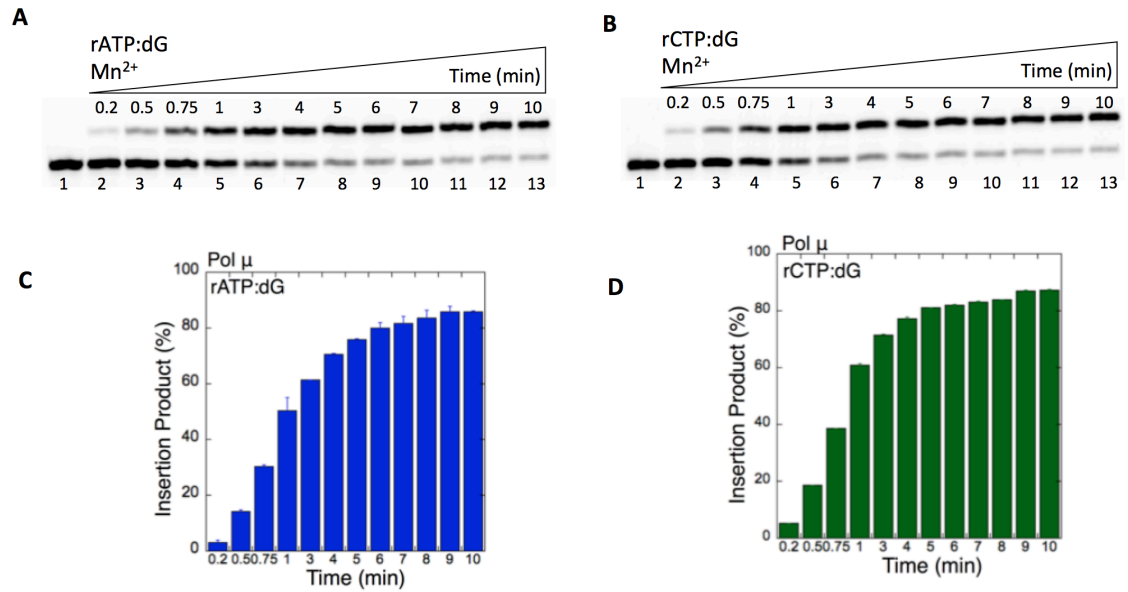

**Supplementary Figure 9.** Pol  $\mu$  rATP and rCTP insertion opposite dG. (**A,B**) In both panels, lane 1 is the minus enzyme control for the one nucleotide gapped DNA substrate with template dG. Lanes 2-13 are the insertion reaction products for rATP:dG (**A**) and rCTP:dG (**B**), and correspond to time points of 0.2, 0.5, 0.75, 1, 3, 4, 5, 6, 7, 8, 9, and 10 min. (**C,D**) Graphs show time-dependent changes in the products of insertion (blue for rATP:dG and green for rCTP:dG). The data represent the average of three independent experiments  $\pm$  SD.

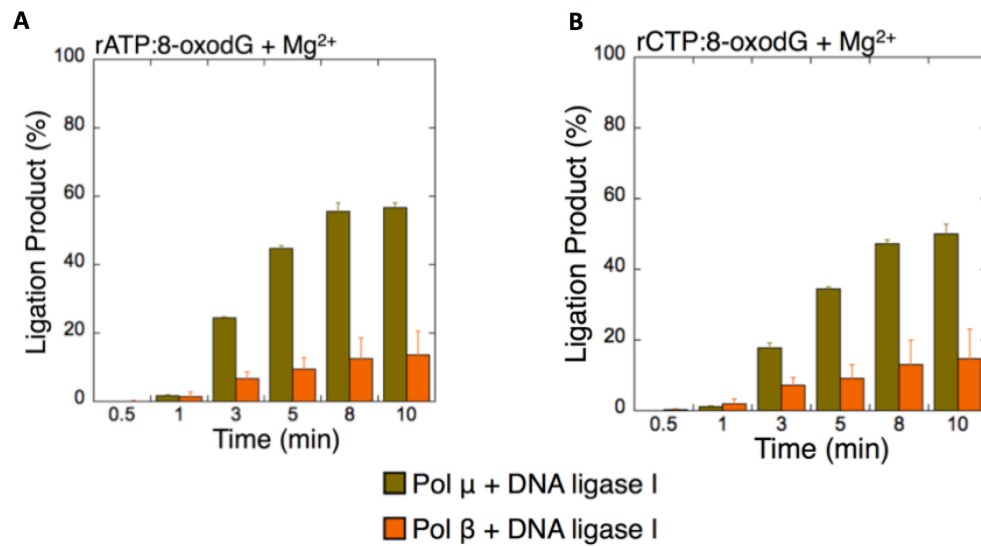

**Supplementary Figure 10.** Graphs show the comparisons for the time-dependent changes in the products of ligation by pol μ and DNA ligase I vs pol β and DNA ligase I in the presence of Mg<sup>2+</sup> for rATP:8-oxodG (**A**) and rCTP:8-oxodG (**B**). The data represent the average of three independent experiments ± SD.

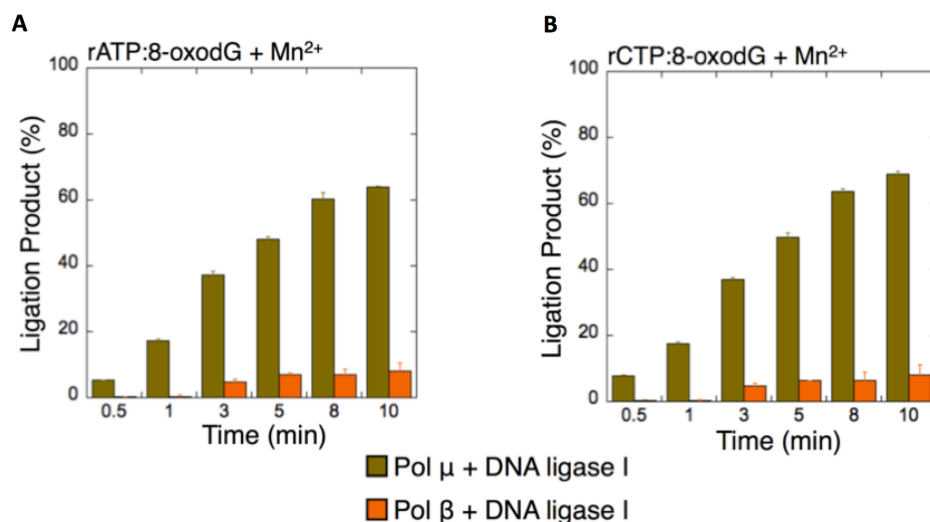

**Supplementary Figure 11.** Graphs show the comparisons for the time-dependent changes in the products of ligation by pol μ and DNA ligase I vs pol β and DNA ligase I in the presence of Mn<sup>2+</sup> for rATP:8-oxodG (A) and rCTP:8-oxodG (B). The data represent the average of three independent experiments ± SD.

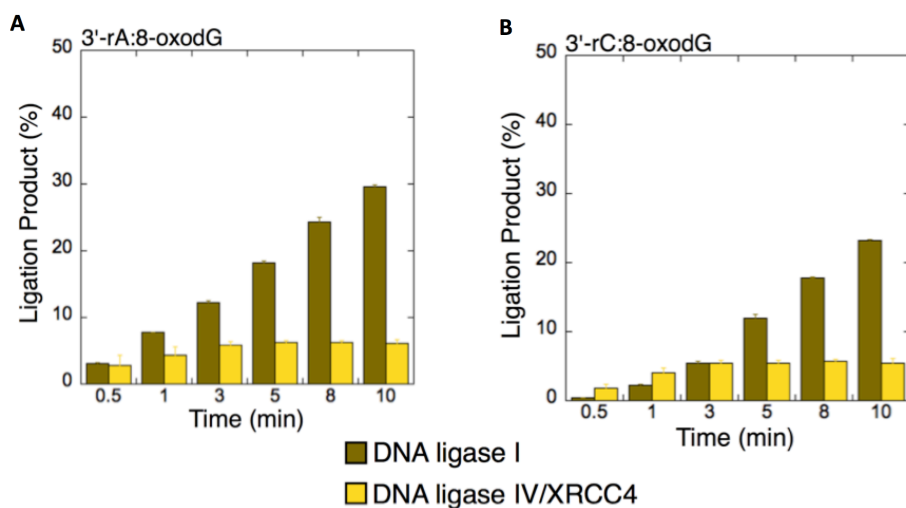

**Supplementary Figure 12.** Graphs show the comparisons for the time-dependent changes in the products of ligation by DNA ligase I vs DNA ligase IV/XRCC4 complex for 3'-rA:8-oxodG (A) and 3'-rC:8-oxodG (B). The data represent the average of three independent experiments ± SD.



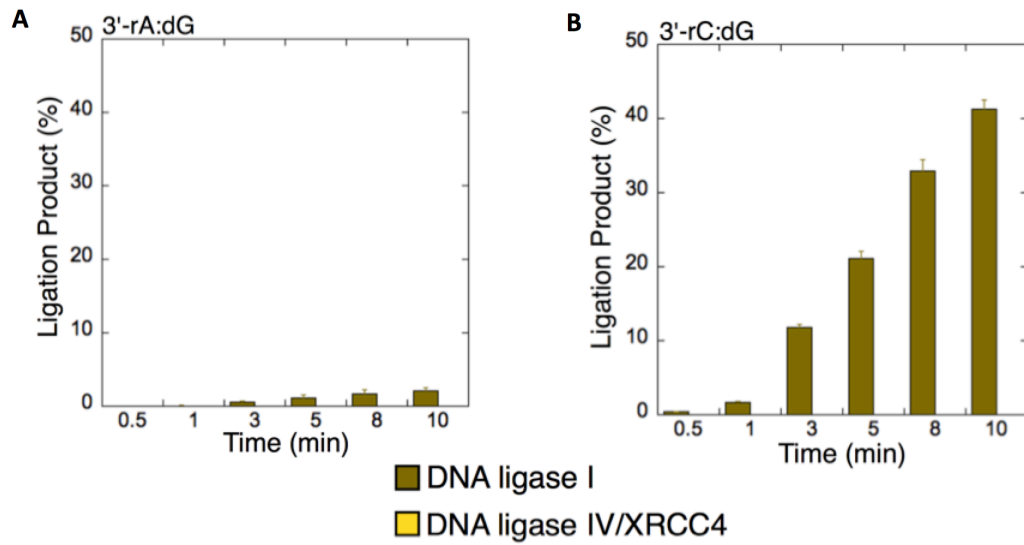

**Supplementary Figure 13.** Graphs show the comparisons for the time-dependent changes in the products of ligation by DNA ligase I vs DNA ligase IV/XRCC4 complex for 3'-rA:dG (**A**) and 3'-rC:dG (**B**). The data represent the average of three independent experiments  $\pm$  SD.

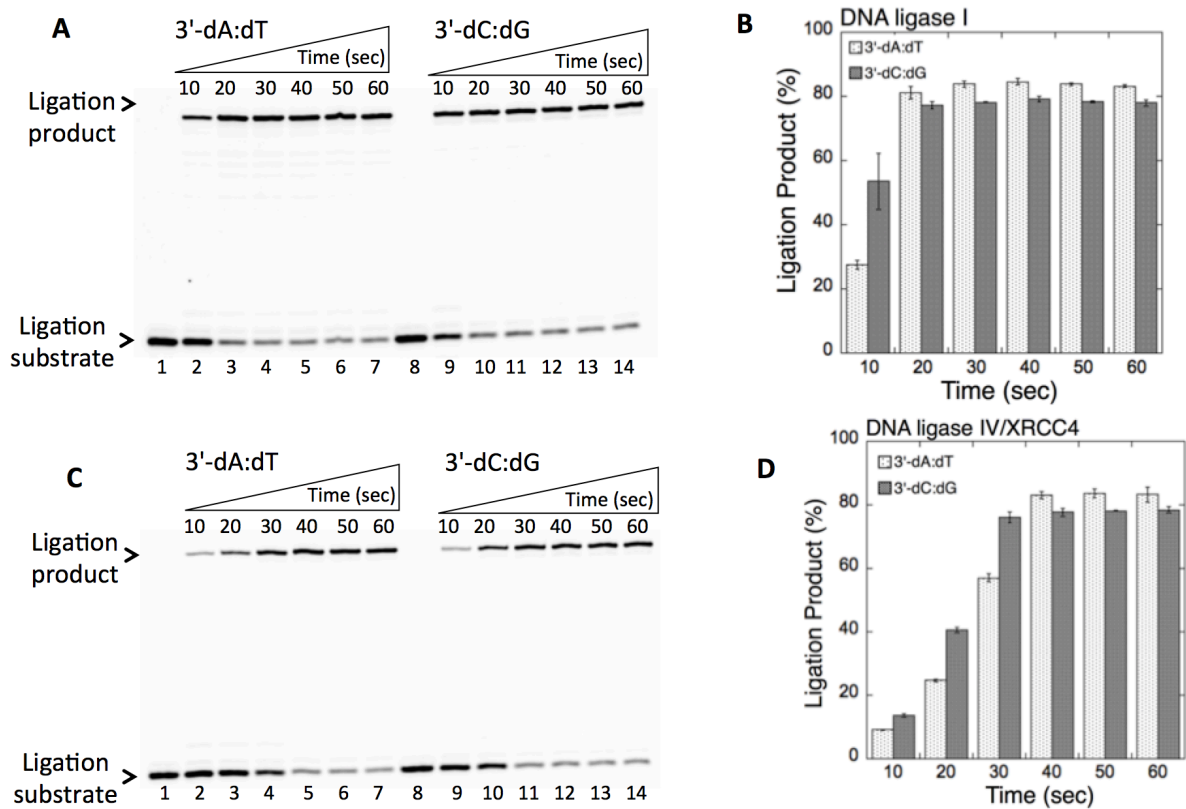

**Supplementary Figure 14.** Ligation of preinserted 3'-dA opposite dT and 3'-dC opposite dG by DNA ligase I vs DNA ligase IV/XRCC4 complex. (A,C) In both panels, lanes 1 and 8 are the minus enzyme controls for the nicked DNA substrates with 3'-dA:dT and 3'-dC:dG, respectively. Lanes 2-7 and 9-14 are the ligation products, and correspond to time points of 0.5, 1, 3, 5, 8, and 10 min. (B,D) Graphs show time-dependent changes in the products of ligation by DNA ligase I (B) and DNA ligase IV/XRCC4 complex (D). The data represent the average of three independent experiments  $\pm$  SD.

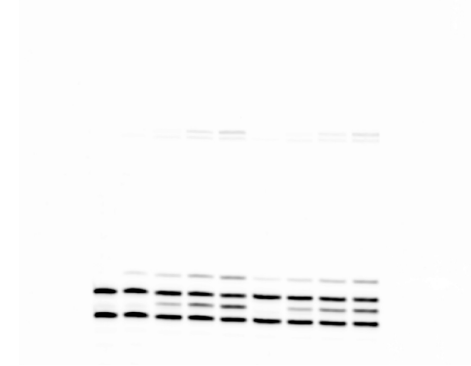

**Supplementary Figure 15.** Pol  $\mu$  dATP and dCTP insertion opposite 8-oxodG coupled with ligation by DNA ligase I in the presence of  $Mg^{2+}$ .

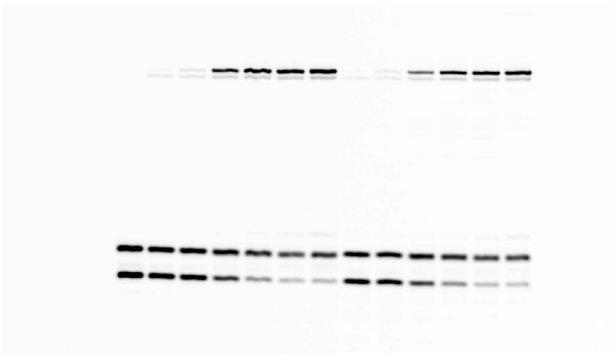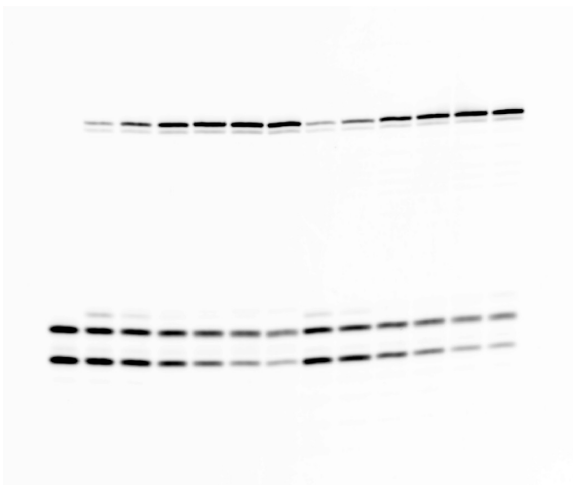

**Supplementary Figure 16.** Pol  $\mu$  rATP and rCTP insertion opposite 8-oxodG coupled with ligation by DNA ligase I in the presence of  $Mg^{2+}$  vs  $Mn^{2+}$ .

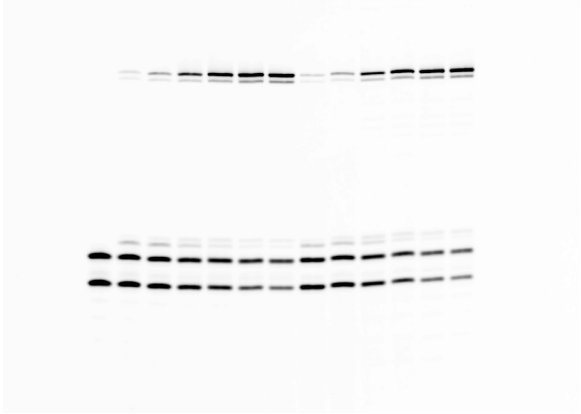

**Supplementary Figure 17.** Pol  $\mu$  rATP and rCTP insertion opposite 8-oxodG coupled with ligation by DNA ligase IV/XRCC4 complex in the presence of  $Mn^{2+}$ .

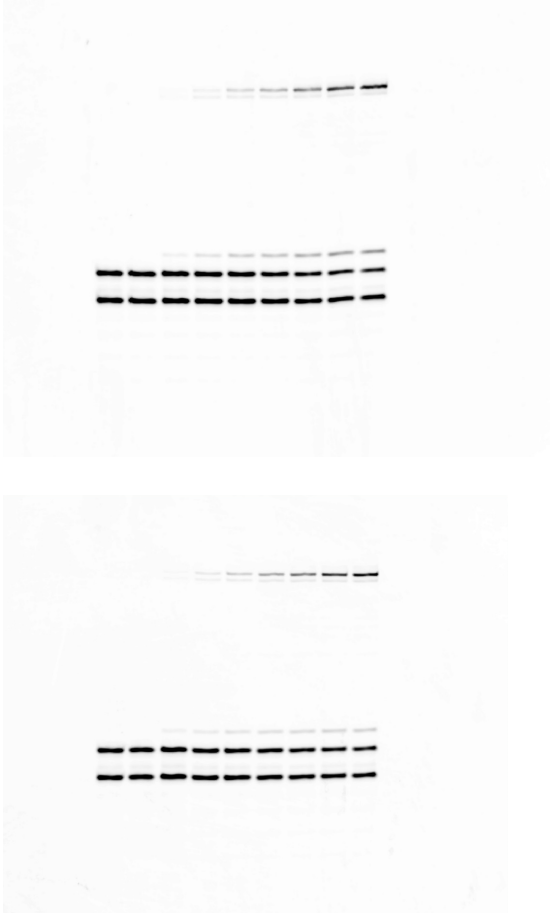

**Supplementary Figure 18.** Pol  $\mu$  rATP and rCTP insertion opposite 8-oxodG coupled with ligation by DNA ligase IV/XRCC4 complex in the presence of  $Mg^{2+}$  vs  $Mn^{2+}$ .

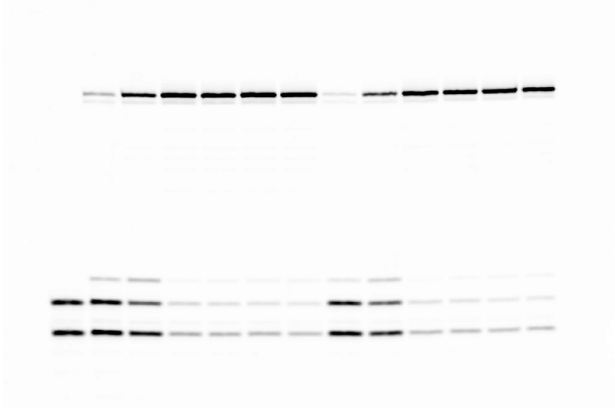

**Supplementary Figure 19.** Full-length pol  $\mu$  rATP and rCTP insertion opposite 8-oxodG coupled with ligation by DNA ligase IV/XRCC4 complex.

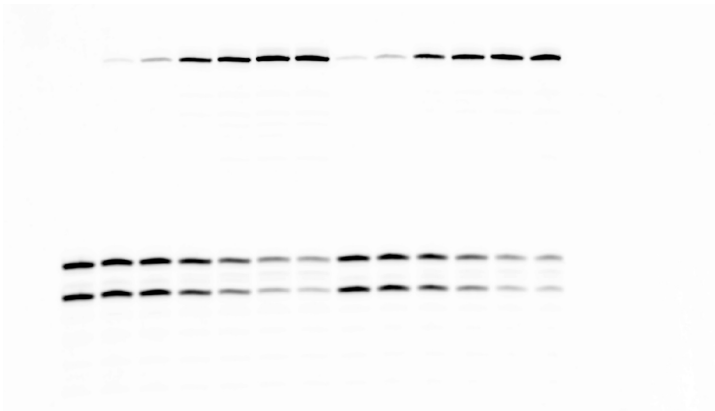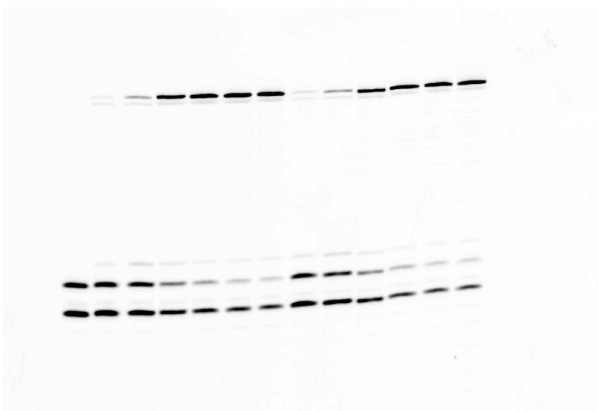

**Supplementary Figure 20.** Pol  $\mu$  rATP and rCTP insertion opposite dG coupled with ligation by DNA ligase I vs DNA ligase IV/XRCC4 complex.

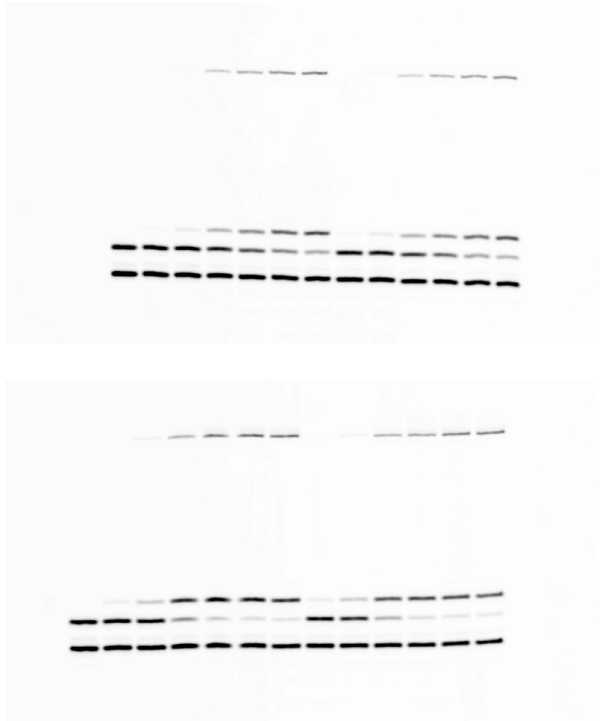

**Supplementary Figure 21.** Pol  $\beta$  rATP and rCTP insertion opposite 8-oxodG coupled with ligation by DNA ligase I in the presence of  $Mg^{2+}$  vs  $Mn^{2+}$ .

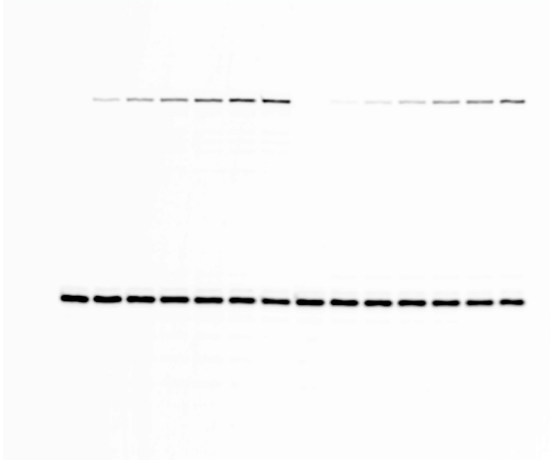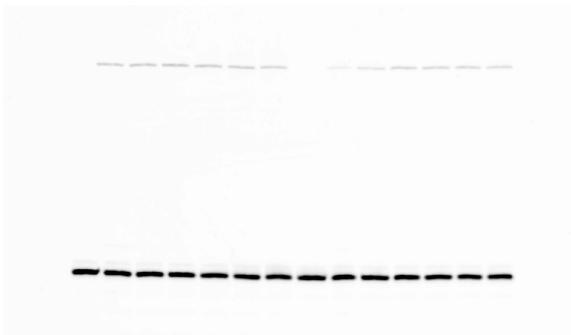

**Supplementary Figure 22.** The ligation of preinserted 3'-rA and 3'-rC opposite 8-oxodG by DNA ligase I vs DNA ligase IV/XRCC4 complex.

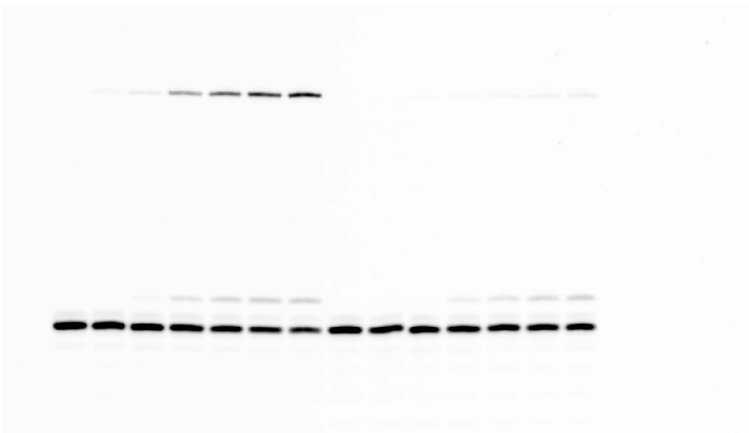

**Supplementary Figure 23.** The ligation of preinserted 3'-rC and 3'-rA opposite dG by DNA ligase I.

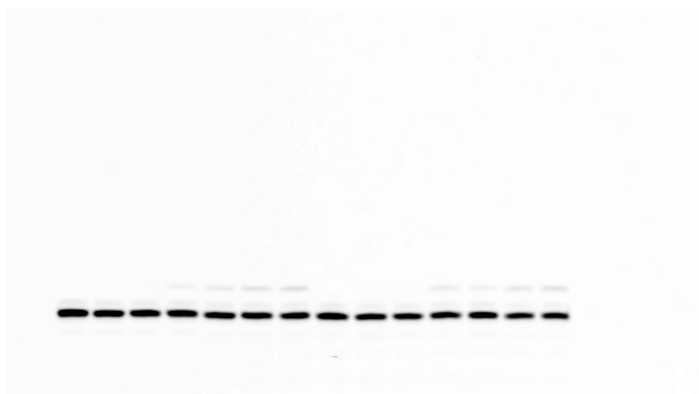

**Supplementary Figure 24.** The ligation of preinserted 3'-rC and 3'-rA opposite dG by DNA ligase IV/XRCC4 complex.

| Substrate                        | Sequence                                                                                              |
|----------------------------------|-------------------------------------------------------------------------------------------------------|
| Substrate X <sup>coupled</sup>   | 5'-FAM-CATGGGCGGCATGAACC GAGGCCCATCCTCACC-FAM-3'<br>3'-GTACCCGCCGTACTTGG <u>X</u> CTCCGGGTAGGAGTGG-5' |
| Substrate G <sup>coupled</sup>   | 5'-FAM-CATGGGCGGCATGAACC GAGGCCCATCCTCACC-FAM-3'<br>3'-GTACCCGCCGTACTTGGGCTCCGGGTAGGAGTGG-5'          |
| Substrate X <sup>insertion</sup> | 5'-FAM-CATGGGCGGCATGAACC GAGGCCCATCCTCACC-3'<br>3'-GTACCCGCCGTACTTGG <u>X</u> CTCCGGGTAGGAGTGG-5'     |
| Substrate G <sup>insertion</sup> | 5'-FAM-CATGGGCGGCATGAACC GAGGCCCATCCTCACC-3'<br>3'-GTACCCGCCGTACTTGGGCTCCGGGTAGGAGTGG-5'              |
| Substrate X <sup>nicked</sup>    | 5'-CATGGGCGGCATGAACCNGAGGCCCATCCTCACC-FAM-3'<br>3'-GTACCCGCCGTACTTGG <u>X</u> CTCCGGGTAGGAGTGG-5'     |
| Substrate G <sup>nicked</sup>    | 5'-CATGGGCGGCATGAACCNGAGGCCCATCCTCACC-FAM-3'<br>3'-GTACCCGCCGTACTTGGGCTCCGGGTAGGAGTGG-5'              |
| Substrate T <sup>nicked</sup>    | 5'-CATGGGCGGCATGAACCNGAGGCCCATCCTCACC-FAM-3'<br>3'-GTACCCGCCGTACTTGGT <u>T</u> CTCCGGGTAGGAGTGG-5'    |

**Supplementary Table 1.** The one nucleotide gapped and nicked DNA substrates used in this study. FAM indicates the presence of a fluorescence tag, N represents 3'-preinserted ribonucleotide (3'-rA and 3'-rC) or deoxyribonucleotide (3'-dA and 3'-dC) base, X is for 8-oxodG, and a base at the template base position is underlined.



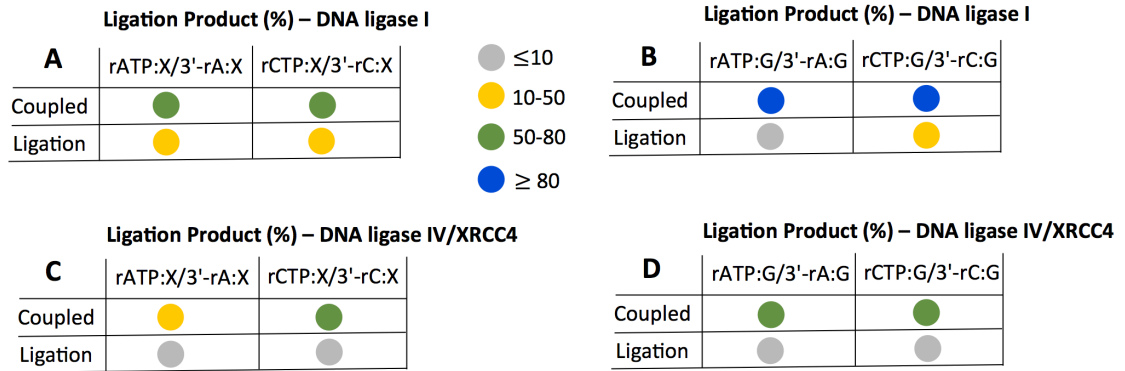

**Supplementary Table 2.** The comparison of the ligation products between the coupled reaction including pol  $\mu$  and DNA ligase I or DNA ligase IV/XRCC4 vs the ligation reaction including DNA ligase I or DNA ligase IV/XRCC4. The data represent the percentage of ligation products for 10 min. The all time points (0.5-10 min) were presented as bar graphs in Figures 11-14.

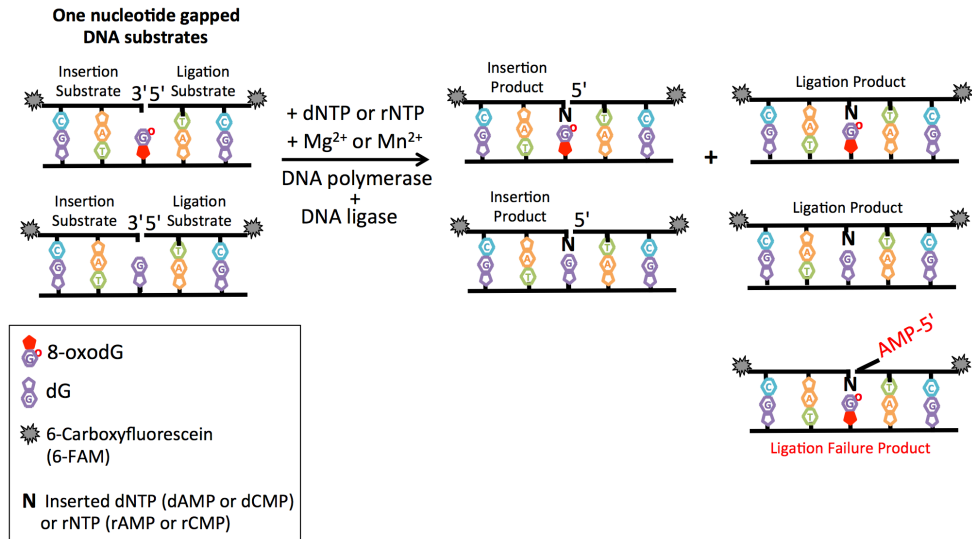

**Supplementary Scheme 1.** Illustration of the coupled assay that enables to measure DNA polymerase (pol  $\mu$  or pol  $\beta$ ) dNTP (dATP or dCTP) or rNTP (rATP or rCTP) insertion coupled with ligation by DNA ligase (DNA ligase I or DNA ligase IV/XRCC4) in the presence of Mg<sup>2+</sup> or Mn<sup>2+</sup>. The single-nucleotide gapped DNA substrate includes a template base (8-oxodG or dG) and two fluorescent (FAM) labels at both 5'- and 3'-ends.

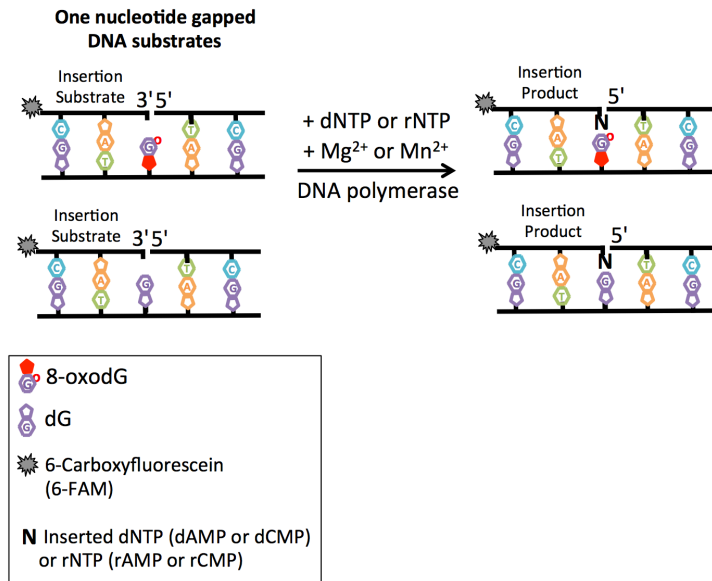

**Supplementary Scheme 2.** Illustration of the nucleotide insertion assay that enables to measure dNTP (dATP or dCTP) or rNTP (rATP or rCTP) insertion by DNA polymerase (pol  $\mu$  or pol  $\beta$ ) alone. The single-nucleotide gapped DNA substrate includes a template base (8-oxodG or dG) and a fluorescent (FAM) label at 5'-end.

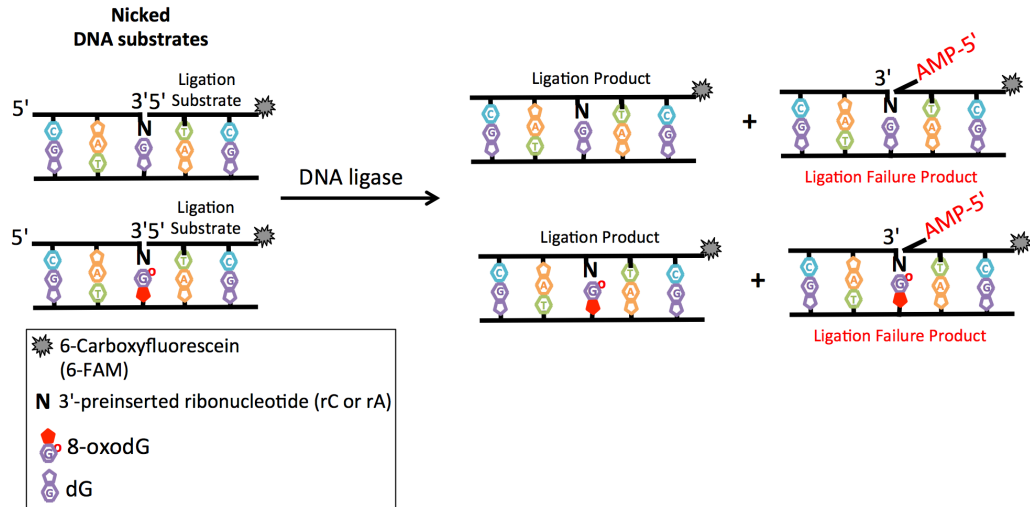

**Supplementary Scheme 3.** Illustration of the ligation assay that enables to measure the ligation by DNA ligase (DNA ligase I or DNA ligase IV/XRCC4 complex) alone. The nicked DNA substrate contains a preinserted ribonucleotide (3'-rA and 3'-rC) or deoxyribonucleotide (3'-dA and 3'-dC) base, a template base (8-oxodG or dG), and a fluorescent (FAM) label at 3'-end.

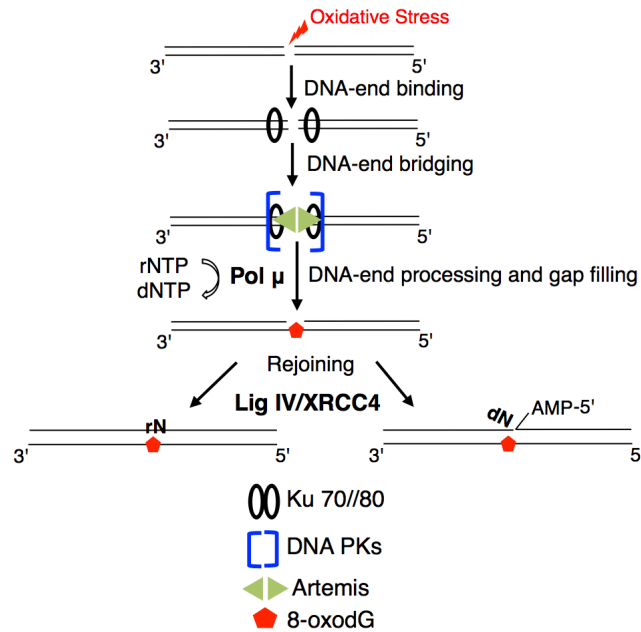

**Supplementary Model 1.** The ligation efficiency of pol  $\mu$ -mediated ribonucleotide vs deoxyribonucleotide-containing repair intermediates by DNA ligase IV/XRCC4 during non-homologous end-joining. The model represents the recruitment of multi-protein complex for the repair of double-strand breaks in response to the oxidative DNA damage (8-oxodG). Based on the results observed in this study, the insertion of ribonucleotides (rATP or rCTP), not deoxyribonucleotides (dATP or dCTP), by pol  $\mu$  during mutagenic bypass of 8-oxodG could lead to an efficient DNA ligation and the formation of promutagenic repair intermediates.
